# Supplementary material for: The Effect P Additive on the CeZrAl Support Properties and the Activity of the Pd Catalysts in Propane Oxidation
Source: MDPI journal article supplement (doi:10.3390/ma17051003), 2024-02-22
Supplement: s1 [file s1]

## Supporting Information (SI)

### **The Effect P Additive on the CeZrAl Support Properties and the Activity of the Pd Catalysts in Propane Oxidation**

Feng Feng <sup>1,2</sup>, Hong Li <sup>3,4</sup>, Xingxia Yang <sup>2,3,4,\*</sup>, Chengxiong Wang <sup>2,3,4</sup>, Yunkun Zhao <sup>2,3,4</sup>,  
Hua Wang <sup>1</sup> and Junchen Du <sup>2,3,4,\*</sup>

<sup>1</sup> Faculty of Metallurgical and Energy Engineering, Kunming University of Science and Technology, Kunming 650093, China

<sup>2</sup> State-Local Joint Engineering Research Center of Precious Metal Catalytic Technology and Application, Kunming Sino-Platinum Metals Catalysts Co. Ltd., Kunming 650106, China

<sup>3</sup> Yunnan Precious Metal Laboratory Co., Ltd., Kunming 650100, China

<sup>4</sup> State Key Laboratory of Advanced Technologies for Comprehensive Utilization of Platinum Metals, Kunming Institute of Precious Metals, Kunming 650100, China

\* Correspondence: xingxia.yang@spm-catalyst.com (X.Y.); dujunchen2006126@126.com (J.D.)

## Table of contents

|                                                                                                                                                                              |          |
|------------------------------------------------------------------------------------------------------------------------------------------------------------------------------|----------|
| <b>Figure S1.</b> Raman spectra of the aged CeZrPAI composite oxides prepared by different methods .....                                                                     | <b>2</b> |
| <b>Table S1.</b> The P content on the surface of the support prepared by different preparation (results presented in weight percentage), mapping data based on the EDS ..... | <b>3</b> |
| <b>Table S2.</b> The data of OSC of supports prepared by different methods based on normalized surface area data .....                                                       | <b>4</b> |
| <b>Figure S2.</b> Raman spectra of the aged CeZrPAI composite oxides with different phosphorus contents .....                                                                | <b>5</b> |
| <b>Table S3.</b> The P content on the surface of supports with different P adding (results presented in weight percentage), mapping data based on the EDS .....              | <b>6</b> |
| <b>Table S4.</b> The data of OSC of supports with different P adding based on normalized surface area data .....                                                             | <b>7</b> |
| <b>Table S5</b> The data on Pd particle size of catalysts loaded on supports with and without P .....                                                                        | <b>8</b> |

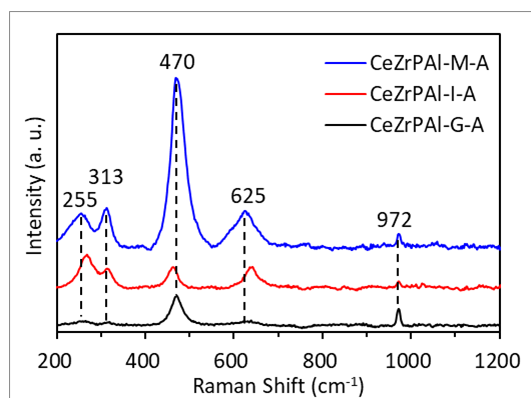

**Figure S1.** Raman spectra of the aged CeZrPAI composite oxides prepared by different methods.

**Table S1** The P content on the surface of the support prepared by different methods (results presented in weight percentage), mapping data based on the EDS.

| Samples   | P content (wt%) |      |
|-----------|-----------------|------|
|           | F               | A    |
| CeZrPAI-G | 1.62            | 1.31 |
| CeZrPAI-I | 1.39            | 1.24 |
| CeZrPAI-M | 1.42            | 1.29 |

**Table S2** The data of OSC of supports prepared by different methods based on normalized surface area data.

| Samples   | OSC/SA (mmol/m <sup>2</sup> ) |      |
|-----------|-------------------------------|------|
|           | F                             | A    |
| CeZrPAI-G | 0.91                          | 0.63 |
| CeZrPAI-I | 1.41                          | 0.72 |
| CeZrPAI-M | 0.83                          | 0.39 |

Notes: Given as surface area, SA.

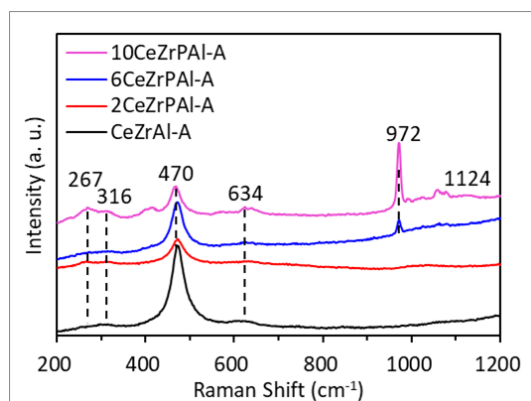

**Figure S2.** Raman spectra of the aged CeZrPAI composite oxides with different phosphorus contents.

**Table S3** The P content on the surface of supports with different P adding (results presented in weight percentage), mapping data based on the EDS.

| Samples   | P content (wt%) |      |
|-----------|-----------------|------|
|           | F               | A    |
| CeZrAl    | 0               | 0    |
| 2CeZrPAI  | 0               | 0    |
| 6CeZrPAI  | 1.62            | 1.31 |
| 10CeZrPAI | 2.72            | 2.25 |

**Table S4** The data of OSC of supports with different P adding based on normalized surface area data.

| Samples   | OSC/SA (mmol/m <sup>2</sup> ) |      |
|-----------|-------------------------------|------|
|           | F                             | A    |
| CeZrAl    | 1.50                          | 1.44 |
| 2CeZrPAI  | 1.28                          | 1.08 |
| 6CeZrPAI  | 0.89                          | 0.63 |
| 10CeZrPAI | 0.68                          | 0.79 |

Notes: Given as surface area, SA.



**Table S5** The data on Pd particle size of catalysts loaded on supports with and without P.

| Samples  | State | Pd particle size (nm) |
|----------|-------|-----------------------|
| CeZrAl   | F     | 6.2                   |
| 6CeZrPAI |       | 4.9                   |
| CeZrAl   | A     | 11.8                  |
| 6CeZrPAI |       | 13.0                  |
